# Supplementary material
Source: HighWire-hosted journal article supplement (https://hw-f5-jim.highwire.org/content/65/4/747)
Supplement: inline-supplementary-material-1 [file inline-supplementary-material-1.pdf]

|          | Article title                                                                                                                    | 1 <sup>st</sup> AU/year/ref | Study Type/design                             | Population                                                                     | Outcome and intervention                                                                                                                                                                                                                                            | Study question                                                                                                                                                  |
|----------|----------------------------------------------------------------------------------------------------------------------------------|-----------------------------|-----------------------------------------------|--------------------------------------------------------------------------------|---------------------------------------------------------------------------------------------------------------------------------------------------------------------------------------------------------------------------------------------------------------------|-----------------------------------------------------------------------------------------------------------------------------------------------------------------|
| <b>1</b> | Aspirin and Anti-Platelet Agents, Statins, and Beta-blockers                                                                     |                             |                                               |                                                                                |                                                                                                                                                                                                                                                                     |                                                                                                                                                                 |
|          | Cardiac Troponin Measurement in the Critically Ill: Potential for Guiding Clinical Management                                    | <b>Poe /2015/25</b>         | Retrospective cohort                          | Critically-ill Veterans in cTn cohort without other cardiac diagnosis n=19,979 | 30 day mortality with high cTn, OR 1.82 (95% CI 1.62, 2.04) P= <0.001; On BB OR 0.81 (95% CI 0.68,0.95) P=0.009; On Statin OR 0.99 (95% CI 0.82,1.19) P=0.9105; On Aspirin OR 0.81 (95% CI 0.69,0.96) P=0.0165                                                      | Is elevated cTn level associated with 30-day mortality, and are there additional associations with ASA, statin, or beta blocker use in critically-ill veterans? |
|          | Aspirin and Anti-Platelet agents                                                                                                 |                             |                                               |                                                                                |                                                                                                                                                                                                                                                                     |                                                                                                                                                                 |
| <b>2</b> | Prehospital statin and aspirin use and the prevalence of severe sepsis and acute lung injury/acute respiratory distress syndrome | <b>O'Neal/2011/30</b>       | Prospective cohort, cross-sectional analysis  | 575 MICU or SICU patients aspirin and statin                                   | Multivariate analysis, statin prehospital less likely to develop severe sepsis (OR 0.62, 0.40-0.96) or ALI/ARDS (OR 0.60, 0.36-0.99) in 1 <sup>st</sup> 4 days. No change in hospital mortality. Prehospital ASA and statin use had lowest severe sepsis, ALI/ARDS. | Is prehospital ASA and statin use associated with lower risk of sepsis, ALI, or ARDS?                                                                           |
| <b>3</b> | Antiplatelet therapy is associated with decreased transfusion-associated risk of lung dysfunction,                               | <b>Harr/2013/31</b>         | Secondary analysis of prospective Glue Grant. | 839 severely injured blunt trauma patients, excluded TBI                       | Pre-injury antiplatelet associated with less lung dysfunction(p=0.0116), multi-organ failure (p=0.0291), and trend to reduced                                                                                                                                       | Is antiplatelet use (ASA, clopidogrel, or ticlopidine) associated with reduced ALI, MOF, or mortality?                                                          |

|          | Article title                                                                                                                                           | 1 <sup>st</sup> AU/year/ref  | Study Type/design                                                      | Population                                                | Outcome and intervention                                                                                                                                                                      | Study question                                                                             |
|----------|---------------------------------------------------------------------------------------------------------------------------------------------------------|------------------------------|------------------------------------------------------------------------|-----------------------------------------------------------|-----------------------------------------------------------------------------------------------------------------------------------------------------------------------------------------------|--------------------------------------------------------------------------------------------|
|          | multiple organ failure, and mortality in trauma patients                                                                                                |                              |                                                                        |                                                           | mortality(p=0.06)                                                                                                                                                                             |                                                                                            |
| <b>4</b> | Association of prehospitalization aspirin therapy and acute lung injury: results of a multicenter international observational study of at-risk patients | <b>Kor/2011/32</b>           | Secondary analysis of prospective cohort study with propensity scoring | Patients at risk for acute lung injury; 3,855, 976 on ASA | Univariate analysis suggests reduced ALI in ASA patients (OR 0.65, 0.46-0.90, p=0.01). After propensity adjustment, no association with prehospital ASA and ALI (OR 0.70, 0.48-1.03, p=0.72). | Is prehospital ASA associated with reduced risk in patients at risk for acute lung injury? |
| <b>5</b> | Outcomes of severe sepsis and septic shock patients on chronic antiplatelet treatment: a historical cohort study                                        | <b>Valerio-Rojas/2013/33</b> | Retrospective cohort with propensity analysis                          | Severe sepsis, septic shock; 651 patients, 43% on aspirin | After adjusting, no reduction in mortality with ASA (OR 0.73, 0.46-1.16), ALI and ARDS was reduced (OR 0.62, 0.45-0.87).                                                                      | Is prehospital ASA associated with reduced ALI/ARDS or mortality?                          |
| <b>6</b> | Prehospitalization antiplatelet therapy is associated with a reduced incidence of acute lung injury: a population-based cohort study                    | <b>Erlich/2011/34</b>        | Retrospective cohort 2006, at risk for ALI with propensity score       | 161 MICU patients at risk for ALI in 2006                 | ASA associated with reduced incidence ALI/ARDS (OR 0.37, 0.16-0.84, p=0.02), after adjustment.                                                                                                | Is prehospital ASA associated with reduced ALI?                                            |
| <b>7</b> | Prehospital aspirin use is associated with reduced risk of acute respiratory distress syndrome in                                                       | <b>Chen/2015/35</b>          | Secondary analysis of prospective study with propensity score          | 1,149 critically ill patients                             | After adjusting, prehospital ASA associated with reduced ARDS (OR 0.66, 0.46-0.94)                                                                                                            | Is prehospital ASA associated with less ARDS?                                              |

|           | Article title                                                                                                                                | 1 <sup>st</sup> AU/year/ref | Study Type/design                                                          | Population                                                                                               | Outcome and intervention                                                                                                                                                    | Study question                                                                            |
|-----------|----------------------------------------------------------------------------------------------------------------------------------------------|-----------------------------|----------------------------------------------------------------------------|----------------------------------------------------------------------------------------------------------|-----------------------------------------------------------------------------------------------------------------------------------------------------------------------------|-------------------------------------------------------------------------------------------|
|           | critically ill patients: a propensity-adjusted analysis                                                                                      |                             |                                                                            |                                                                                                          |                                                                                                                                                                             |                                                                                           |
| <b>8</b>  | Acetyl salicylic acid usage and mortality in critically ill patients with the systemic inflammatory response syndrome and sepsis             | <b>Eisen/2012/36</b>        | Retrospective cohort with propensity analysis                              | All consecutive ICU admissions (7,945) from 4/2000-11/2009; 5,523 first episode of SIRS, 2,082 given ASA | ASA associated with lower mortality in sepsis patients after propensity matching (27.4% vs 42.2%, absolute RR 14.8% (18.9%, 8.6%))                                          | Does ASA reduce mortality in SIRS patients?                                               |
| <b>9</b>  | Effects of low-dose acetylsalicylic acid and atherosclerotic vascular diseases on the outcome in patients with severe sepsis or septic shock | <b>Otto/2013/37</b>         | Retrospective chart review, logistic regression but no propensity analysis | 886 septic patients to SICU                                                                              | ASA: lower mortality (OR 0.56, 0.37-0.84)<br>Statin: no mortality benefit<br>Clopidogrel had similar benefit to ASA, but if ASA and clopidogrel together – benefit was lost | Is ASA or statin associated with reduced mortality in septic patients?                    |
| <b>10</b> | Benefit of low-dose aspirin and non-steroidal anti-inflammatory drugs in septic patients                                                     | <b>Sossdorf/2013/39</b>     | Retrospective chart review                                                 | 979 severe sepsis patients                                                                               | ASA associated with lower mortality OR 0.57, 0.39-0.83); NSAID also benefit OR 0.5, 0.26-0.94; benefit abolished when given together OR 1.12, 0.55-2.25                     | Are NSAIDs also associated with lower mortality in septic patients?                       |
| <b>11</b> | Aspirin Has a Protective Effect Against Adverse Outcomes in Patients with Nonvariceal Upper                                                  | <b>Wehbeh/2015/40</b>       | Retrospective review                                                       | ICU patients with upper GI bleeding; 717 patients with non-variceal UGIB, 56% taking                     | Multivariate analysis, ASA is protective against in hospital mortality OR 0.26, 0.13-0.53                                                                                   | Determine the effect of ASA on mortality in patients with non-variceal upper GI bleeding? |

|           | Article title                                                                                                       | 1 <sup>st</sup> AU/year/ref | Study Type/design                                                                       | Population                                                                                | Outcome and intervention                                                                                                                                                                         | Study question                                                                                                         |
|-----------|---------------------------------------------------------------------------------------------------------------------|-----------------------------|-----------------------------------------------------------------------------------------|-------------------------------------------------------------------------------------------|--------------------------------------------------------------------------------------------------------------------------------------------------------------------------------------------------|------------------------------------------------------------------------------------------------------------------------|
|           | Gastrointestinal Bleeding                                                                                           |                             |                                                                                         | at least 1 antithrombotic agent                                                           |                                                                                                                                                                                                  |                                                                                                                        |
| <b>12</b> | Antiplatelet drugs and outcome in mixed admissions to an intensive care unit                                        | <b>Winning/2010/41</b>      | Retrospective cohort                                                                    | 615 mixed medical-surgical patients                                                       | Logistic regression analysis showed pre-admit antiplatelet agents associated with reduced mortality (OR 0.19, 0.12-0.33), especially if APACHE II > 20                                           | Hypothesis: antiplatelet drugs favorably affect outcome in patients non-electively admitted to an intensive care unit. |
| <b>13</b> | Association between aspirin therapy and the outcome in critically ill patients: a nested cohort study               | <b>Al Harbi/2016/42</b>     | Nested cohort of two combined RCTs (one RCT – insulin regimen, other – feeding regimen) | 763 ICU patients                                                                          | ASA is not associated with reduced mortality adjusted OR 1.18, 0.69-2.02, p=0.55; ASA was associated with increased risk of severe sepsis and increased mechanical ventilation duration          | Is antiplatelet therapy associated with reduced mortality in an ICU population?                                        |
|           | <b>Statins</b>                                                                                                      |                             |                                                                                         |                                                                                           |                                                                                                                                                                                                  |                                                                                                                        |
| <b>14</b> | Effect of statin therapy on mortality in patients with ventilator-associated pneumonia: a randomized clinical trial | <b>Papazian/2013/45</b>     | RCT double blinded multicenter                                                          | ICU patients requiring mechanical ventilation APACHE 18-19 (Anticipated mortality 27-30%) | No significant difference in mortality in statin treated patients with SUSPECTED ventilator assisted pneumonia. Stopped early for futility (300 patients enrolled of anticipated 1,002 patients) | To determine whether statin therapy reduces 28-day mortality in patients with ventilator assisted pneumonia            |
| <b>15</b> | Rosuvastatin for sepsis-associated                                                                                  | <b>Truwit/2014/46</b>       | RCT double blinded                                                                      | 745 ICU patients with ARDS;                                                               | No difference in mortality in either group.                                                                                                                                                      | To determine whether rosuvastatin (40mg load,                                                                          |

|           | Article title                                                                                                   | 1 <sup>st</sup> AU/year/ref | Study Type/design                        | Population                                                                             | Outcome and intervention                                                                                                                                                                                                | Study question                                                                             |
|-----------|-----------------------------------------------------------------------------------------------------------------|-----------------------------|------------------------------------------|----------------------------------------------------------------------------------------|-------------------------------------------------------------------------------------------------------------------------------------------------------------------------------------------------------------------------|--------------------------------------------------------------------------------------------|
|           | acute respiratory distress syndrome                                                                             |                             | multicenter                              | stopped for futility<br>APACHE III 99 (one third, or APACHE II 22.5)<br>42% death rate | Increased risk of hepatic and renal adverse effects.                                                                                                                                                                    | 20mg daily) reduced hospital or 60-day mortality in sepsis related ARDS patients           |
| <b>16</b> | Simvastatin in the acute respiratory distress syndrome                                                          | <b>McAuley/2014/47</b>      | RCT double blinded multicenter           | ICU patients with ARDS, 540 patients enrolled APACHE II 18-19                          | No difference (including 20-day mortality) in statin treated group, also no difference in adverse effects.                                                                                                              | Does simvastatin 80mg improve ventilator free days in patients?                            |
| <b>17</b> | A multicenter randomized trial of atorvastatin therapy in intensive care patients with severe sepsis            | <b>Kruger/2013/48</b>       | Phase II, RCT double blinded multicenter | ICU patients with severe sepsis; 250 randomized, APACHE II 22-25                       | Acute use of atorvastatin does not alter IL-6 levels, but trend toward improved 28-day mortality in patients who had been on statin prior to study and were kept on it (mortality higher in group where it was stopped) | Does atorvastatin 20mg alter IL-6 concentration, ICU mortality or 28 and 90-day mortality? |
| <b>18</b> | Impact of statins in outcomes of septic patients: a systematic review                                           | <b>Tralhao/2014/49</b>      | Systematic review                        | RCTs and cohort studies of statins in sepsis                                           | 5 RCTs do not show mortality benefit from statins in sepsis patients; 16 cohort studies showed benefit                                                                                                                  | Meta-analysis of statins in sepsis, and whether there is mortality benefit?                |
| <b>19</b> | Statin therapy in critically-ill patients with severe sepsis: a review and meta-analysis of randomized clinical | <b>Thomas/2015/50</b>       | Meta-analysis                            | 4 RCTs in critically ill patients with sepsis, 1818 patients                           | 4 RCTs, sepsis; no difference in 28-day mortality (RR 0.953, 0.715-1.271) or 60-day mortality (RR 0.93, 0.722-1.198)                                                                                                    | Meta-analysis of statins in critically-ill septic patients, is there mortality benefit?    |

|           | Article title                                                                                                                                     | 1 <sup>st</sup> AU/year/ref | Study Type/design                   | Population                                                                    | Outcome and intervention                                                                                                                                      | Study question                                                                                              |
|-----------|---------------------------------------------------------------------------------------------------------------------------------------------------|-----------------------------|-------------------------------------|-------------------------------------------------------------------------------|---------------------------------------------------------------------------------------------------------------------------------------------------------------|-------------------------------------------------------------------------------------------------------------|
|           | trials                                                                                                                                            |                             |                                     |                                                                               |                                                                                                                                                               |                                                                                                             |
| <b>20</b> | The effect of statins on mortality in septic patients: a meta-analysis of randomized controlled trials                                            | <b>Pasin/2013/51</b>        | Meta-analysis                       | RCTs statins in septic patients, 650 patients, 5 RCTs                         | No difference in mortality with statins (RR 0.90, 0.65-1.26, p=0.6)                                                                                           | Meta-analysis of statins in sepsis, and whether there is mortality benefit?                                 |
| <b>21</b> | Statin therapy and mortality from sepsis: a meta-analysis of randomized trials                                                                    | <b>Deshpande/2015/52</b>    | Meta-analysis and systematic review | Septic patients; 7 RCTs, 1,720 patients                                       | No reduction in-hospital mortality (RR 1.04, 0.87-1.24, p=0.68) or 28-day mortality (RR 0.93, 0.46-1.89, p=0.85)                                              | Is there mortality benefit from statins in septic patients?                                                 |
| <b>22</b> | Safety and vasopressor effect of rosuvastatin in septic patients                                                                                  | <b>El Gendy/2014/53</b>     | RCT, blinded, single center         | 108 septic patients, APACHE 24-25                                             | No difference in ICU and in-hospital mortality, significantly improved number of acceptable BP and SP days with statin (11 $\pm$ 3 vs. 8 $\pm$ 3 (p=0.0001)   | Does statin improve number of acceptable BP and systemic perfusion days (primary) or mortality (secondary)? |
| <b>23</b> | Randomized double-blind placebo-controlled trial of 40 mg/day of atorvastatin in reducing the severity of sepsis in ward patients (ASEPSIS Trial) | <b>Patel/2012/54</b>        | RCT, blinded, single center         | 100 non-ICU septic patients, APACHE II score 12 (14.6% anticipated mortality) | Atorva associated with significantly reduced conversion to severe sepsis (4% vs 24%, p=0.007); no difference in mortality, no differences in adverse effects. | Does atorvastatin 40mg reduce sepsis progression in statin naïve patients hospitalized with sepsis?         |
|           | Beta blockers                                                                                                                                     |                             |                                     |                                                                               |                                                                                                                                                               |                                                                                                             |
| <b>24</b> | Effect of heart rate control with esmolol                                                                                                         | <b>Morelli/2013/55</b>      | Prospective, open-label,            | Septic shock requiring                                                        | Intervention: IV esmolol to keep HR 80-94 bpm                                                                                                                 | To investigate the effect of short acting esmolol in                                                        |

|           | Article title                                                                                   | 1 <sup>st</sup> AU/year/ref | Study Type/design                                                         | Population                                                                                                            | Outcome and intervention                                                                                                                                                                    | Study question                                                                                                            |
|-----------|-------------------------------------------------------------------------------------------------|-----------------------------|---------------------------------------------------------------------------|-----------------------------------------------------------------------------------------------------------------------|---------------------------------------------------------------------------------------------------------------------------------------------------------------------------------------------|---------------------------------------------------------------------------------------------------------------------------|
|           | on hemodynamic and clinical outcomes in patients with septic shock: a randomized clinical trial |                             | randomized, controlled phase 2 clinical trial                             | norepinephrine to maintain BP to MAP 65mmHg                                                                           | for 96 hours<br>Outcome: 28 day mortality HR 0.39, 95% CI 0.26-0.59, p<0.001                                                                                                                | patients with severe septic shock                                                                                         |
| <b>25</b> | Early Propranolol after Traumatic Brain Injury is Associated with Lower Mortality               | <b>Ko/2016/61</b>           | Prospective non-randomized (selected by ICU and neurosurgical attendings) | 440 moderate to severe traumatic brain injury patients in ICU (propranolol started 5 hours after admission, 15 doses) | Propranolol TBI compared to patients not given propranolol; multivariate analysis showed lower mortality in propranolol group OR 0.25, 95% CI 0.08-0.74, p=0.012                            | Does early propranolol administration reduce mortality in TBI patients?                                                   |
| <b>26</b> | Traumatic Brain Injury and beta-blockers: Not All Drugs Are Created Equal                       | <b>Schroeppel/2014/62</b>   | Retrospective, multivariable adjusted                                     | 1,755 TBI patients in ICU                                                                                             | No mortality benefit from BB alone with adjusted analysis, however propranolol vs all other BB showed benefit (3% vs 15% mortality, p=0.002, adjusted OR 0.199, 95% CI 0.043-0.92)          | Hypothesis: propranolol is the best beta-blocker to block excess catecholamines and improve mortality in this population. |
| <b>27</b> | Prospective evaluation of early propranolol after traumatic brain injury                        | <b>Murry/2016/63</b>        | Prospective observational; administered propranolol, not randomized       | Moderate to severe TBI in ICU; 38 patients (28 with propranolol, 10 without (but could get other BB))                 | Intervention: propranolol in first 24 hours of admission, continued 48 hours. Outcome: Mortality rates similar (10% vs 10.7%, p=0.9), but severity of injury was significantly worse in the | Will Propranolol be associated with improved outcomes in moderate and severe TBI patients?                                |

|           | Article title                                                                                     | 1 <sup>st</sup> AU/year/ref | Study Type/design                                                | Population                                                                  | Outcome and intervention                                                                                                                                                                                                                         | Study question                                                                               |
|-----------|---------------------------------------------------------------------------------------------------|-----------------------------|------------------------------------------------------------------|-----------------------------------------------------------------------------|--------------------------------------------------------------------------------------------------------------------------------------------------------------------------------------------------------------------------------------------------|----------------------------------------------------------------------------------------------|
|           |                                                                                                   |                             |                                                                  |                                                                             | non-propranolol group (80% non-propranolol group still got other BB)                                                                                                                                                                             |                                                                                              |
| <b>28</b> | Beta-adrenergic blockade and traumatic brain injury: protective?                                  | <b>Schroeppel/2010/64</b>   | Retrospective chart review                                       | Blunt TBI patients 2,601, >1 dose BB (506, 20%)                             | Multivariate analysis, BB protective OR 0.347 (95% CI 0.246-0.490)                                                                                                                                                                               | Does suppression of catecholamine surge in TBI reduce mortality?                             |
| <b>29</b> | Beta-blocker exposure in patients with severe traumatic brain injury (TBI) and cardiac uncoupling | <b>Riordan/2007/65</b>      | Retrospective review with propensity analysis                    | Severe TBI in 4,116 patients, 141 with BB (29%).                            | Cardiac uncoupling= reduction in HRV in the first 24 hours post-TBI; BB exposure associated with reduced mortality among all patients with severe TBI, regardless of degree of cardiac uncoupling.                                               | Does BB reduce mortality in severe TBI patients? How does this relate to cardiac uncoupling? |
| <b>30</b> | Beta-blockers in isolated blunt head injury                                                       | <b>Inaba/2008/66</b>        | Retrospective review                                             | Isolated TBI patients 1,156, 203 (18% on BB)                                | Stepwise logistic regression: BB is an independent protective factor for mortality aOR 0.54 (95% CI 0.33-0.91, p=0.01) Elderly and more severely injured (abbreviated injury score $\geq 4$ ) had even better outcomes OR 0.3 (0.1-0.6, p=0.001) | Are BB associated with improved survival in acute TBI patients?                              |
| <b>31</b> | Beta-blocker exposure is associated with improved survival after severe                           | <b>Cotton/2007/67</b>       | Retrospective review with propensity scoring, BB exposure = 2 or | TBI patients (severity (AIS) of 3 or greater; BB group older, more severely | 420 patients, 174 patients exposed. aOR with propensity score analysis 0.29 (95% CI 0.14-0.60, p=0.001)                                                                                                                                          | Does adrenergic blockade improve survival among TBI patients?                                |

|           | Article title                                                                                                                      | 1 <sup>st</sup> AU/year/ref | Study Type/design                                | Population                                                          | Outcome and intervention                                                                                                                                                                                                                                                      | Study question                                                                                                                                     |
|-----------|------------------------------------------------------------------------------------------------------------------------------------|-----------------------------|--------------------------------------------------|---------------------------------------------------------------------|-------------------------------------------------------------------------------------------------------------------------------------------------------------------------------------------------------------------------------------------------------------------------------|----------------------------------------------------------------------------------------------------------------------------------------------------|
|           | traumatic brain injury                                                                                                             |                             | more days                                        | injured, lower predicted survival.                                  |                                                                                                                                                                                                                                                                               |                                                                                                                                                    |
| <b>32</b> | Beta-blocker use is associated with improved outcomes in adult trauma pts.                                                         | <b>Arbabi/2007/68</b>       | Retrospective cohort, MV analysis                | 4,117 Trauma patients, 303 (7%) on BB. 45% on BB pre-injury.        | OR for mortality in BB group was 0.3 ( $p<0.001$ ) for BB cohort compared to control.                                                                                                                                                                                         | To determine the safety of BB in head injury patients.                                                                                             |
| <b>33</b> | Troponin increases in the critically injured patient: mechanical trauma or physiologic stress?                                     | <b>Martin/2005/4</b>        | Retrospective review                             | All trauma patients with cTn levels                                 | 1,081 patients, mortality significantly elevated in cTn increased patients (29%): Any increase in cTn was a strong independent predictor of mortality aOR 2.1 (1.4-3.1). BB use assc with 50% decrease in mortality among patients with elevated cTn (38% vs 16%, $p<0.01$ ). | What are the etiologic factors and prognostic significance of increased cTn levels in a widely screened trauma population?                         |
| <b>34</b> | Beta-blocker Exposure in the absence of significant head injuries is associated with reduced mortality in critically ill patients. | <b>Bukur/2012/69</b>        | Retrospective with multivariable analysis        | Critically ill trauma patients without severe TBI, 663 patients     | aOR 0.37 (95% CI 0.18-0.76), $p=0.007$ ; BB are an independent protective factor for mortality, not protective in pts less severely injured (injury severity score < 25) aOR 1.42 (95% CI 0.85-2.36) $p=0.181$                                                                | To determine the impact of beta-blocker exposure on mortality in critically injured trauma patients who did not sustain significant head injuries. |
| <b>35</b> | Preadmission beta-blocker use and 30-day mortality among patients in                                                               | <b>Christensen/2011/70</b>  | Retrospective analysis with propensity matching, | All ICU patients older than 45, 8,087 total, 3,112 after propensity | 30-day mortality 25.7% users vs 31.4% non-users (OR 0.74, 0.63-0.87), surgical patients 0.69                                                                                                                                                                                  | What is the association between beta-blocker use in 30-day mortality of ICU patients?                                                              |

|           | Article title                                                                                                                        | 1 <sup>st</sup> AU/year/ref | Study Type/design                                                                                                                    | Population                                     | Outcome and intervention                                                                                                                                                                                     | Study question                                                                                                                                     |
|-----------|--------------------------------------------------------------------------------------------------------------------------------------|-----------------------------|--------------------------------------------------------------------------------------------------------------------------------------|------------------------------------------------|--------------------------------------------------------------------------------------------------------------------------------------------------------------------------------------------------------------|----------------------------------------------------------------------------------------------------------------------------------------------------|
|           | intensive care: a cohort study                                                                                                       |                             | preadmission beta-blockers                                                                                                           | matching (1,556 in each group)                 | (0.54-0.88), medical 0.71 (0.51-0.98), cardioselective bb 0.70 (0.58-0.83), non-selective 0.99 (0.67-1.47)                                                                                                   |                                                                                                                                                    |
| <b>36</b> | The safety of beta-blocker use in chronic obstructive pulmonary disease patients with respiratory failure in the intensive care unit | <b>Kargin/2014/71</b>       | Retrospective case-control, APACHE (19-20) <b>would have anticipated benefit from ASA also – no mention of ASA use in this group</b> | 188 acute respiratory failure with COPD in ICU | Mortality in ICU 17.6% vs 15.8% (p > 0.75)<br>In-hospital 18.9% vs 19.3% (p>0.95)<br>30-days post-discharge 20% vs 11% (p>0.47) – no difference in mortality between groups <b>when used for HR control.</b> | To compare BB to non-BB rate lowering drugs in COPD patients with acute respiratory failure “due to heart rate limiting” with respect to mortality |
